# Supplementary material
Source: PubMed Central journal article supplement (PMC3889641)

**Supplementary Figure 1. Level of leukocyte invasion and inflammation in the muscularis propria.** Panel A: Leukocyte invasion was measured from CD11b immunofluorescence in normal intestine and compared to normal resection margin and strictured intestine in the same patients. Panel B: was measured from MPO activity in normal intestine and compared to normal resection margin and strictured intestine in the same patients. Results represent the mean  $\pm$  SE of 9 separate patients. \* denotes  $P < 0.05$  vs normal resection margin.

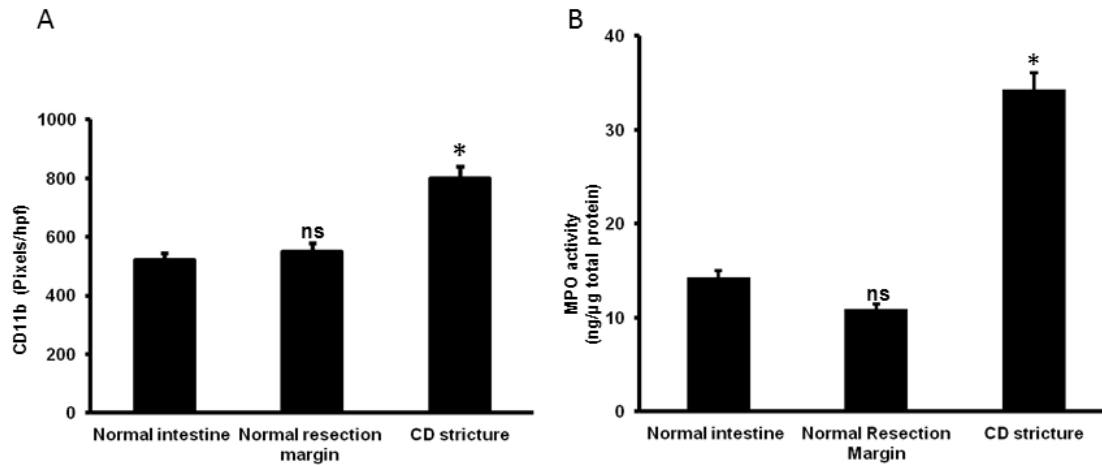

Supplement: NIHMS522635-supplement-1.pdf [file NIHMS522635-supplement-1.pdf]
