# Supplementary material
Source: PubMed Central journal article supplement (PMC3889641)

**Supplementary Figure 2. Inflammatory and immunologic responses in rats after 42 d of chronic TNBS-induced colitis and the effects of cilengitide.** A: Quantification analysis of CD11b immune-reactivity in rat intestine after 42 days TNBS-induced colitis treated with selective integrin  $\alpha\text{V}\beta 3$  inhibitor. B: Leukocyte infiltration was evaluated by MPO assay of rat intestinal muscle cells. C, D, E and F: The effect of cilengitide (18mg/kg/d.i.p.) on the development of fibrosis was due to altered cytokine activation was examined by measurement of Th1, Th2, Th17 related cytokines and IL-1 in rat colon smooth muscle cells after 42 days of TNBS-induced colitis. ns denotes no significant difference vs EtOH/PBS control rats. \* denotes  $P < 0.05$  vs EtOH/PBS treated rats. \*\* denotes  $P < 0.05$  vs TNBS/PBS treated rats. ns denotes no significant difference vs TNBS/PBS control rats.

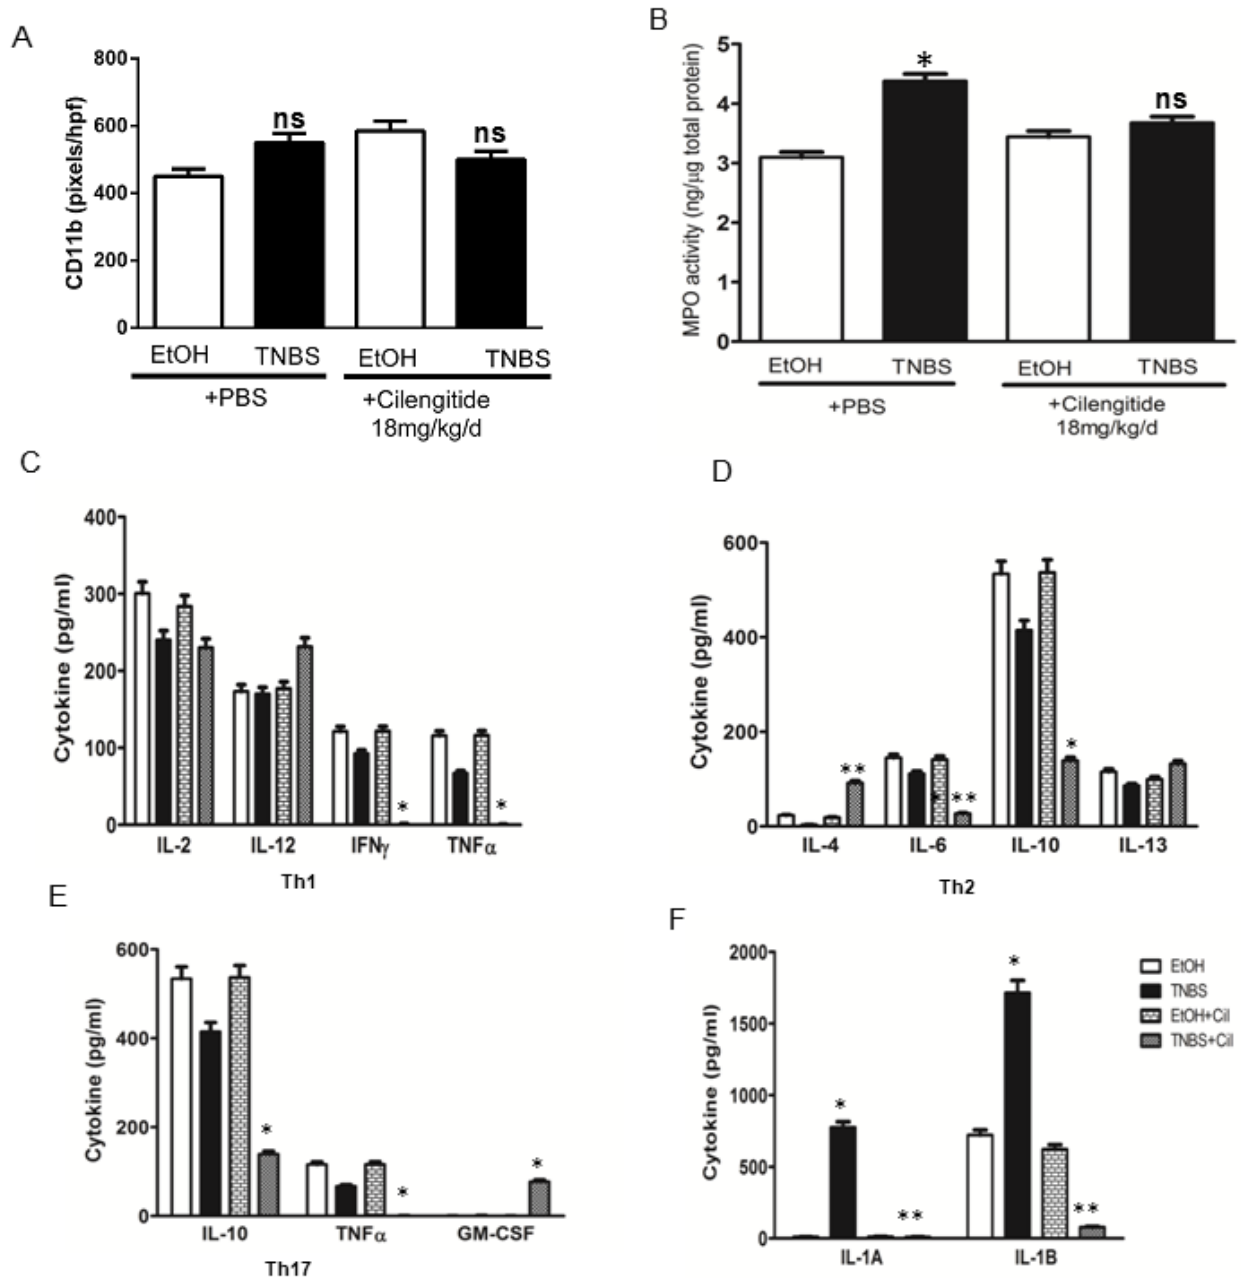

Supplement: NIHMS522635-supplement-2.pdf [file NIHMS522635-supplement-2.pdf]
